# Supplementary material for: Syngeneic natural killer cell therapy activates dendritic and T cells in metastatic lungs and effectively treats low-burden metastases
Source: eLife. 2025 Jan 21;13:RP99010. doi: 10.7554/eLife.99010 (PMC11750138; doi:10.7554/eLife.99010)
Supplement: Figure 1—source data 1. [file elife-99010-fig1-data1.xlsx]

## Sheet: 1B
Figure 1. Characterization of ex vivo-expanded murine NK cells.
Figure 1B. Expression of MHC-I-interacting activating and inhibitory NKRs by the expanded NK cells.
	% of TCR𝛽-TCR𝛿-CD19-NK1.1+ cells
Batch	Ly49D	Ly49H	Ly49A	Ly49G2	Ly49I	NKG2A
1	45.18	37	23.89	53.6	14.44	26.1
2	47.2	39.3	24.47	53.3	13.97	27.8
3						36.5
4						27.89
5						27.13
6	43.5	35.7	22.17	58.09		20.87
7	39.19	33.22	23.27	57.69		18.52
8	40.51		23.137	54.5		26.41
9	29.3	27.2	21.8	50.4	16.4	31.7
10	32.2	30.5	24.3	52.1	10.4	34.2
11	49.2	48.3	30.7	63.5
12-1						32.1
12-2						32.3
13						33.2
14						28.5
15	25.7		22.2	47.4	18.7	34.9
16					10.6	35.1
17	25.9	23	23.8	51.4	17.4	28.6
18					11.6	30.6
19	23.2		21.2	51.6	18.6	32.8

## Sheet: 1C
Figure 1. Characterization of ex vivo-expanded murine NK cells.
Figure 1C. Expression of activation markers by the expanded NK cells.
	% of TCR𝛽-TCR𝛿-CD19-NK1.1+ cells
Batch	DNAM-1	CD11c+B220-	CD11c+B220+	CD11c-B220+	CD11c-B220-
1		4.05	85.5	6.74	3.72
2		3.54	85.8	7.36	3.32
3		2.53	84	10	3.43
4		3.1	85	8.88	3
5		2.51	86.9	8.25	2.38
6	99.2	2.29	87.2	7.96	2.58
7	96.7	3.85	88.1	6.13	1.88
8	98.5	5.28	82.4	8.41	3.88
9		2.37	83.3	10.2	4.15
10		5.36	79.5	9.37	5.81
11	88.4	1.06	87.2	11.1	0.598
12-1		3.57	84.7	8.43	3.34
12-2		3.59	83.2	9.51	3.65
13		2.28	82.3	11.5	3.83
14		3.3	82.1	9.8	4.81
15	77	3.95	77.5	13.3	5.28
16	85.9	5.45	78.7	11.1	4.77
17	71.5	1.44	73.3	21	4.29
18	88.1	4.98	69.2	19.6	6.22
19	78.3	6.1	67	19.7	7.27

## Sheet: 1D
Figure 1. Characterization of ex vivo-expanded murine NK cells.
Figure 1D. Expression of anti-tumor effectors by the expanded NK cells.
	ΔMFI
Batch	IFN-g	GrzB	TRAIL
1	341		277
2	166		393.1
3	129	622
4	123	517
5	95	584
6	250.4
7	150.1
8	194.8
9	199		117.7
10	137.4	684
11	199
12-1	66.4	667.1
12-2	66.4	769
13	78	874
14	92	804
16			180.1
18			112.5

## Sheet: 1E
Figure 1. Characterization of ex vivo-expanded murine NK cells.
Figure 1E. In vitro cytotoxicity of the expanded NK cells.
	Relative survival rate
	B16F10		E0771
tumor only	100	100	100	100
0.3:1	89.0428	86.5823	75.6329	73.1298
1:1	75.4408	71.519	49.5253	43.0534
3:1	55.5416	52.6582	23.1013	16.3359
9:1	41.4358	46.5823	9.74684	8.59542

## Sheet: 1F
Figure 1. Characterization of ex vivo-expanded murine NK cells.
Figure 1F. Tumor cells stimulated IFN-g production by the expanded NK cells.
	iso			IFN𝛾			ΔMFI = IFN𝛾-iso			relative ΔMFI
	NK only	NK+EO771	NK+B16	NK only	NK+EO771	NK+B16	NK only	NK+EO771	NK+B16	NK only	NK+EO771	NK+B16
Exp1	191	146	137	340	684	390	149	538	253	1	3.61074	1.69799
Exp2	138	105	92.7	597	3722	739	459	3617	646.3	1	7.88017	1.40806
										ΔMFI of NK+EO771/ΔMFI of NK only
										ΔMFI of NK+B16F10/ΔMFI of NK only
