# Supplementary material for: Syngeneic natural killer cell therapy activates dendritic and T cells in metastatic lungs and effectively treats low-burden metastases
Source: eLife. 2025 Jan 21;13:RP99010. doi: 10.7554/eLife.99010 (PMC11750138; doi:10.7554/eLife.99010)
Supplement: Figure 2—source data 1. [file elife-99010-fig2-data1.xlsx]

## Sheet: 2A
Figure 2. EO771 tumor resection and metastasis model for NK cell treatment.
Figure 2A. Positive correlation between primary tumor weight and lung metastasis.
	No. of metastatic foci			Total area of lung metastases
Mice code	D21 tumor weight	No. of metastatic foci		D21 tumor weight	Total area of lung metastases
1	1356.8	7		1356.8	0.975
2	873.1	5		873.1	0.227
3	574.4	3		574.4	0.817
4	183	2		183	0.148
5	381.7	1		381.7	0.004
6	626.7	1		626.7	0.026
7	856.5	5		856.5	0.438
8	119.8	2		119.8	0.391
9	433	6		433	0.261
10	1354.2	18		1354.2	1.567
11	733.3	5		733.3	0.301
12	367.2	1		367.2	0.025
13	384	0		384	0
14	401	3		401	0.199
17	1036.2	7		1036.2	0.823
18	501.2	16		501.2	0.871
19	270.9	0		270.9	0
20	791.7	7		791.7	0.291

## Sheet: 2B
Figure 2. EO771 tumor resection and metastasis model for NK cell treatment.
Figure 2B. Survival of mice who received day 21 tumor resection, sham surgery, or no treatment.
Exp	Day post inoculation	resection	Sham	no treatment
Exp 1	80	1
	46	1
	67	1
	44	1
	54	1
	44	1
	88	1
Exp 2	76	1
	60	1
	75	1
	71	1
	68	1
	58	1
	34	1
	41	1
	180	0
	180	0
Exp 3	79	1
	58	1
	72	1
	67	1
	83	1
	46	1
	52	1
	89	1
	66	1
	66	1
	42	1
	180	0
	180	0
Exp 4	48	1
	69	1
	78	1
	94	1
	50	1
	40	1
	62	1
	40	1
	54	1
	71	1
	180	0
	180	0
	180	0
	180	0
Exp 1	37		1
	39		1
	54		1
	39		1
	54		1
	57		1
	50		1
Exp 4	41		1
	31		1
	31		1
	32		1
	43		1
Exp 5	69			1
	63			1
	36			1
	52			1
	42			1
	33			1
	35			1
	34			1
	39			1
	52			1
Exp 6	42			1
	36			1
	67			1
	53			1
	53			1
	43			1
	44			1
	33			1
Exp 7	44			1
	45			1
	47			1
	44			1
	54			1
	50			1
	42			1
	35			1
	65			1
	41			1
Exp 8	64			1
	43			1
	39			1
	63			1
	62			1
	53			1
	34			1
	51			1
	56			1
	42			1
Exp 9	66	1

## Sheet: 2D
Figure 2. EO771 tumor resection and metastasis model for NK cell treatment.
Figure 2D. Expression of CXCR3, CCR5 and CXCR6 ligands in the lung.
	Relative expression
mice code	CXCL9	CXCL10	CXCL11	CCL3	CCL4	CCL5	CXCL16
1	0.12429	0.189918	0.305574	0.403557	0.384475	0.486449	0.79754
2	0.08581	0.211552	0.603407	0.412033	0.225509	0.491761	0.90394
3	0.438354	0.914124	2.06352	0.82499	0.604122	0.818888	0.973059
4	0.33285	0.303394	1.32217	0.809847	0.670672	1.00566	1.24
5	0.134151	0.275143	1.19655	0.413068	0.609318	0.878557	1.1641

## Sheet: 2E
Figure 2. EO771 tumor resection and metastasis model for NK cell treatment.
Figure 2E. Expanded eGFP+ NK cells were transferred into day 21 EO771-resected mice on day 24.
Lung	Detected NK cells (in per106 live single cell)
	4	16	30	46	66	90	(hours)
mouse 1	11900	600	214	96.5	32	18.3
mouse 2	5900	414	231	55.5	27.2	29.9
mouse 3	9870	627	166	81.6	36.5	37.2
SP	Detected NK cells (in per106 live single cell)
	4	16	30	46	66	90	(hours)
mouse 1	84.6	60.8	27.9	12.7	5.27	6.22
mouse 2	49.2	51.4	19.3	10.3	7.5	9.27
mouse 3	108	79.3	22.9	12.8	4.78	9.19
