# Supplementary material for: Syngeneic natural killer cell therapy activates dendritic and T cells in metastatic lungs and effectively treats low-burden metastases
Source: eLife. 2025 Jan 21;13:RP99010. doi: 10.7554/eLife.99010 (PMC11750138; doi:10.7554/eLife.99010)
Supplement: Figure 3—figure supplement 1—source data 1. [file elife-99010-fig3-figsupp1-data1.xlsx]

## Sheet: S1
	Figure 3-figure supplement 1. Effectiveness of in vivo depletion of CD4+ and CD8+ T cells by antibody (related to Figure 3D).
	CD4
	Day post inoculation	Exp1, Reduction rate (%)							Exp2, Reduction rate (%)			Exp3, Reduction rate (%)
	23	100	100						99.9723	99.9728		99.8815	99.9644	99.9708
	28	100	100	100
	31	99.8065	99.6093		86.1797				99.9698	83.3288	99.4154	99.8717	98.8742	99.9721
	37	89.9569	87.9693			80.6163		75.5417	61.4073	58.2679	64.6549	43.7077	61.4614	74.7767
	45	84.1567	79.1252				80.088	66.7242	41.5426	34.5061	49.5535		69.7429		10.1488	20.433
	CD8
	Day post inoculation	Exp1, Reduction rate (%)							Exp2, Reduction rate (%)			Exp3, Reduction rate (%)
	23	100	100						100	99.1648	99.1795	99.759	99.663	99.9605
	28	100	100	100
	31	99.7915	99.9062		98.6842				99.5458	98.2784	97.1868	99.1355	99.9238	99.9245
	37	99.9801	99.9632			100		100	89.9634	91.2088	89.8168	99.6557	99.9018	100
	45	98.7534	99.8062				99.4453	99.8966	69.3773	91.6484	82.4908		97.7143		99.5707	93.0769
