# Supplementary material for: Syngeneic natural killer cell therapy activates dendritic and T cells in metastatic lungs and effectively treats low-burden metastases
Source: eLife. 2025 Jan 21;13:RP99010. doi: 10.7554/eLife.99010 (PMC11750138; doi:10.7554/eLife.99010)
Supplement: Figure 3—source data 1. [file elife-99010-fig3-data1.xlsx]

## Sheet: 3A
Figure 3. Syngeneic NK cell therapy is effective in treating mice with low metastatic burden in a CD8+-T-cell-dependent manner.
Figure 3A. Day 21 tumor weight is inversely correlated with survival duration of NK-cell-treated tumor-resected mice.
	NK cell				Control
	D21 tumor weight	Survival			D21 tumor weight	Survival
Exp1	451	51		Exp 1	117.7	80
	478.4	55			168.7	46
	507.1	82			371.3	67
	609	55			373.3	44
	863.4				403.8	54
Exp 2	221.7	79			693	44
	234.3				837.9	88
	334.2			Exp 2	120.8	76
	430	78			197.1
	535	38			252.6
	651	54			253	60
	740.3	51			410.5	75
	903.3	45			458.5	71
Exp 3	252				564.4	68
	366	67			736.4	58
	459				759.1	34
	474				793.4	41
	514	62		Exp 3	250
	565	61			252	79
	596	42			379	58
	627	50			403	72
	717	46			478
	767	42			506	67
	917	61			575	83
Exp 5	277.8	83			579	46
	328				657	52
	390.8	70			712	89
	423				853	66
	429				878	66
	448.5	82			1209	42
	477.5	53		Exp 4	215
	562	49			250
	599.4	53			300
	660	57			326	48
	694	53			380	69
	824.3	70			397	78
	1113.7	43			549
Exp 6	363				593	94
	388	58			649	50
	482	59			673	40
	501	72			783.6	62
	511	67			793	40
	573	70			875	54
	590				921	71
	626	68		Exp 5	95	66
	743	51
	843	53
	979	50
Exp 7	267.6	64
	278.5	77
	361.2
	364.6
	421.2	71
	421.6	52
	502.3	66
	542.4	81
	677.4	58
	689	35
Exp 8	111.4
	300.3
	397.8	69
	443.8	62
	558.1	57
	616.7	55
	709
	788	66
	987.8	54
Exp 9	225.9
	227.8
	483
	530.6
	680.7
	696	50
	879.6	63
	881.7	48
	1022.1	61
	1065.2	42

## Sheet: 3B
Figure 3. Syngeneic NK cell therapy is effective in treating mice with low metastatic burden in a CD8+-T-cell-dependent manner.
Figure 3B. NK cell therapy promotes long-term survival of mice who had light tumors on day 21.
	Tumor: 95 - 400mg					Tumor: > 400mg
	Day post inoculation	Control	NK cell			Day post inoculation	Control	NK cell
Exp1	80	1			Exp 1	54	1
	46	1				44	1
	67	1				88	1
	44	1			Exp2	41	1
Exp2	76	1				58	1
	180	0				34	1
	180	0				68	1
	60	1				75	1
Exp 3	79	1				71	1
	180	0			Exp 3	72	1
	58	1				180	0
Exp 4	180	0				67	1
	180	0				83	1
	180	0				46	1
	48	1				52	1
	69	1				89	1
	78	1				66	1
Exp 8	66	1				66	1
Exp 1	180		0			42	1
Exp2	180		0		Exp 4	180	0
	180		0			94	1
	79		1			50	1
	180		0			40	1
	180		0			62	1
Exp 3	180		0			40	1
	180		0			54	1
	67		1			71	1
Exp 5	83		1		Exp 1	51		1
	180		0			55		1
	180		0			82		1
	70		1			180		0
Exp 6	180		0			55		1
	58		1		Exp2	54		1
	180		0			51		1
Exp 7	180		0			45		1
	180		0			38		1
	64		1			78		1
	77		1		Exp 3	180		0
Exp 9	180		0			180		0
	69		1			62		1
	180		0			61		1
	180		0			42		1
	180		0			50		1
						46		1
						42		1
						61		1
					Exp 5	180		0
						180		0
						82		1
						53		1
						49		1
						53		1
						57		1
						53		1
						70		1
						43		1
					Exp 6	68		1
						59		1
						72		1
						67		1
						70		1
						180		0
						51		1
						53		1
						50		1
					Exp 7	71		1
						52		1
						66		1
						81		1
						58		1
						35		1
					Exp 9	62		1
						57		1
						55		1
						180		0
						66		1
						54		1
					Exp 10	180		0
						180		0
						180		0
						50		1
						63		1
						48		1
						61		1
						42		1

## Sheet: 3C
Figure 3. Syngeneic NK cell therapy is effective in treating mice with low metastatic burden in a CD8+-T-cell-dependent manner.
Figure 3C. NK cell therapy induces tumor-specific protection. Surviving mice after NK cell therapy were re-challenged with EO771 or B16F10 cells.
	Mice code	Day after rechallenge	EO771 to NK cell treated survivors	B16F10 to NK cell treated survivors	EO771 to naive mice	B16F10 to naive mice
Exp 1	1	44			1
	2	38			1
	3	61			1
	4	36			1
	5	37			1
	6	37			1
	7	45			1
	8	36			1
	9	47			1
	10	66			1
	11	40			1
Exp 3	12	36			1
	13	68			1
	14	33			1
	15	63			1
	16	59			1
Exp 8	17	74			1
	18	38			1
	19	59			1
	20	44			1
	21	65			1
	22	51			1				0
	23	69			1
Exp 2	24	83	1
	25	180	0
	26	180	0
	27	180	0
	28	180	0
	29	180	0
	30	47	1
	31	180	0
Exp 5	32	180	0
	33	180	0
Exp 7	34	180	0
	35	180	0
Exp 3	36	47				1
	37	26				1
Exp 4	38	53				1
	39	48				1
	40	54				1
Exp 8	41	45				1
	42	33				1
	43	46				1
	44	32				1
	45	44				1
	46	46				1
	47	45				1
Exp 6	48	48		1
	49	44		1
	50	75		1
Exp 7	51	27		1
	52	51		1

## Sheet: 3D
Figure 3. Syngeneic NK cell therapy is effective in treating mice with low metastatic burden in a CD8+-T-cell-dependent manner.
Figure 3D. Depletion of CD4+ or/and CD8+ cells alter the effects of NK cell therapy.
		Tumor: 95-600 mg							Tumor: >600 mg
	Day dead	Isotype control	anti-CD4,CD8/NK	anti-CD4/NK	anti-CD8/NK			Day dead	Isotype control	anti-CD4,CD8/NK	anti-CD4/NK	anti-CD8/NK
Exp1	105	0					Exp1	76	1
	105	0						105	0
	95	1						71	1
	86	1						57	1
	105	0						105	0
	48	1						67	1
	105	0						105	0
	67	1						46		1
	63	1						52		1
	105	0						58		1
	105	0						49		1
	105	0						49		1
	105	0						49		1
	67	1					Exp2	61	1
	105	0						42	1
	62		1					51	1
	63		1					72	1
	46		1					54	1
	50		1					42	1
	57		1					34	1
	59		1					44		1
	50		1					46		1
	47		1					42		1
	43		1					51		1
	55		1					38		1
	49		1					39		1
	58		1					67			1
	49		1					105			0
	50		1					63			1
	57		1					105			0
	57		1					105			0
Exp2	78	1						105			0
	60	1						105			0
	105	0						81				1
	69	1						51				1
	105	0						71				1
	105	0						61				1
	105		0					94				1
	54		1					57				1
	44		1				Exp3	39	1
	70		1					42	1
	52		1					105	0
	105			0				42	1
	105			0				40	1
	105			0				45	1
	105			0				42	1
	66			1				105			0
	62			1				43			1
	66				1			57			1
	105				0			105			0
	73				1			39			1
	48				1			70			1
	62				1			71			1
	100				1			80			1
	59				1			39				1
Exp3	105	0						61				1
	40	1						52				1
	59	1						61				1
	105	0						41				1
	79	1						45				1
	54	1						48				1
	105			0				46				1
	79			1				38				1
	57			1				51				1
	105			0
	105			0
	73			1
	40				1
	58				1
	105				0
	55				1

## Sheet: 3E
Figure 3. Syngeneic NK cell therapy is effective in treating mice with low metastatic burden in a CD8+-T-cell-dependent manner.
Figure 3E. T cells isolated from surviving mice post NK cell therapy and tumor re-challenge confer anti-tumor activity.
		Donor: post NK cell therapy and re-challenge survivors							Donor: aged-matched naïve mice
				Donor cell type							Donor cell type
Adoptive transfer exp	Primary mice	Mice code	Day dead	T	non-T	No cells		Adoptive transfer exp	Mice code	Day dead	T	non-T	No cells
Exp1	Exp 1	1	85	1				Exp1	1	28	1
		2	120	0					2	33	1
	Exp 2	3	120	0					3	31	1
		4	120	0					4	33	1
Exp 2	Exp 3	1	120	0					5	31	1
		2	120	0					6	35	1
Exp1	Exp 1	1	51		1			Exp2	1	30	1
		2	39		1				2	30	1
	Exp 2	3	120		0				3	30	1
		4	66		1				4	27	1
Exp 2	Exp 3	1	35		1			Exp1	1	26		1
		2	39		1				2	28		1
Exp1	Exp 1	1	36			1			3	26		1
		2	27			1			4	26		1
	Exp 2	3	30			1			5	26		1
		4	27			1			6	31		1
Exp 2	Exp 3	1	35			1		Exp2	1	33		1
		2	72			1			2	24		1
									3	36		1
									4	30		1
								Exp1	1	31			1
									2	31			1
									3	42			1
									4	31			1
									5	28			1
								Exp2	1	33			1
									2	24			1
									3	36			1
									4	30			1
