# Supplementary material for: Syngeneic natural killer cell therapy activates dendritic and T cells in metastatic lungs and effectively treats low-burden metastases
Source: eLife. 2025 Jan 21;13:RP99010. doi: 10.7554/eLife.99010 (PMC11750138; doi:10.7554/eLife.99010)
Supplement: Figure 4—source data 1. [file elife-99010-fig4-data1.xlsx]

## Sheet: cDC1
Figure 4. Syngeneic NK cell transfer modulates APC function of cDC in the metastatic lungs.
Figure 4B. NK-cell transfer affects the activation of lung cDCs: cDC1.
		% of cDC1			CD86 MFI			CD40 MFI			PD-L1 MFI			MHC-I MFI			MHC-II MFI
		CCR7+LMAP3+MHC-Iihi cDC1	CCR7-LMAP3-MHC-IIlo cDC1	MHC-IIlo cDC1	CCR7+LMAP3+MHC-Iihi cDC1	CCR7-LMAP3-MHC-Iilo cDC1	MHC-Iilo cDC1	CCR7+LMAP3+MHC-Iihi cDC1	CCR7-LMAP3-MHC-Iilo cDC1	MHC-Iilo cDC1	CCR7+LMAP3+MHC-Iihi cDC1	CCR7-LMAP3-MHC-Iilo cDC1	MHC-Iilo cDC1	CCR7+LMAP3+MHC-Iihi cDC1	CCR7-LMAP3-MHC-Iilo cDC1	MHC-Iilo cDC1	CCR7+LMAP3+MHC-Iihi cDC1	CCR7-LMAP3-MHC-Iilo cDC1	MHC-Iilo cDC1
PBS	Experiment 1	10.8	11.3	78.3	16627	12632	2024	1156	592	409	1151	329	217	17536	9305	7870	86899	72138	10746
		11.5	11.6	77.8	16181	11932	2116	1204	657	457	994	361	222	21742	10355	8556	93073	71759	11643
		14.1	13	73.9	16983	11881	1944	1270	678	426	1129	325	215	18574	8847	7035	99226	72124	11533
		13	10.6	77	16880	11475	2002	1123	580	449	900	318	220	17634	9023	7171	94585	76244	11569
	Experiment 2	6.41	10.7	83.6	11678	6496	1688	1200	559	375	1172	398	315	22112	10297	9433	127110	80220	13767
		8.34	10.7	81.5	10960	7380	1731	1195	592	393	1218	433	322	22784	10840	9487	112457	79676	13781
		10.6	16.2	73.9	10504	7259	1775	1278	614	388	1456	445	331	22781	11152	10451	127666	88514	15670
		7.86	13.1	79.8	11822	6846	1742	1245	604	396	1366	421	317	22352	11836	10429	119856	82029	14762
		6.51	11	83.1	10224	6623	1673	1219	585	396	1196	394	317	18470	9016	8277	128820	80912	14803
WT NK	Experiment 1	36.5	23.3	40.9	22511	18656	3255	1452	825	550	1582	570	336	22036	12258	9890	94614	78560	14860
		31	23	46.9	23032	15617	2838	1221	677	446	1272	466	285	17210	9996	8330	97961	78448	15163
		26.7	24.4	50	24013	16494	2861	1286	709	517	1413	488	288	19653	11149	9038	95051	76914	15038
		16.3	21.9	62.6	19291	13355	2857	1098	666	461	979	471	277	17945	10497	9166	91684	73796	15178
		22.2	16.7	61.7	22377	16196	3051	1180	683	486	1195	459	279	22640	12096	10836	84967	70581	13090
	Experiment 2	16.9	26.1	58	16933	10365	2098	1300	701	417	1474	496	341	20023	11506	10604	115400	88177	16385
		20.8	24.4	55.5	17139	10567	2138	1290	717	411	1259	501	353	20736	12201	11337	114915	86066	16475
		24.1	28.6	48.2	17096	10107	2178	1390	750	437	1383	531	372	19572	11268	10475	118538	88883	18886
		17.1	26.1	57.9	16369	9937	2136	1366	704	419	1257	483	333	21183	11460	11015	124406	89224	17654
		18.2	26.8	56.1	15330	9162	2049	1267	695	430	1253	470	341	19979	11341	10500	122099	88623	18526
Il10-/- NK	Experiment 1	27.4	24.5	49.4	24088	16067	3316	1244	730	468	1251	480	287	21279	12394	9890	90586	74733	16109
		23.6	19.4	57.8	21291	16193	3032	1223	691	462	1215	439	279	21021	12213	8330	82447	70747	14477
		27	23.7	50.8	24061	17996	3425	1335	800	510	1388	526	309	19724	11904	9038	86028	73336	15662
		22.5	22.5	56	22319	16184	2874	1268	815	480	1196	485	300	19387	11578	9166	90900	75121	13864
		25.8	23.6	52.1	23863	17200	3215	1381	750	514	1338	488	306	24093	13655	10836	93051	73592	15035
	Experiment 2	17.5	25.6	57.6	16007	9699	2088	1350	723	438	1315	482	350	21357	12011	11420	123622	89007	17700
		18.3	30.4	52.3	16605	9503	2157	1479	775	449	1326	466	338	20552	11675	10828	124188	87348	18362
		17	28.9	55.4	14974	8754	2034	1445	778	427	1280	495	330	19087	11243	10457	126401	91852	18146
		20.5	27.5	52.8	17061	11440	2296	1441	806	433	1242	498	343	21656	12244	11155	120182	92367	16567
		20	30.7	50.2	19031	11095	2300	1525	832	442	1306	537	346	21357	12581	11477	135248	96643	18005
Ifng-/- NK	Experiment 1	13	11.1	76.6	17434	12481	2500	1123	552	457	1053	386	279	20417	10581	9242	89485	67239	11636
		14.4	11.9	74.6	16304	13017	2258	1206	733	444	1167	419	250	18812	10440	8132	91114	74170	10915
		9.49	11.1	80.1	18691	12705	2188	1084	623	468	1025	408	266	19065	10595	8696	90200	74977	11098
		12.9	11.1	76.6	16019	13304	2388	1169	685	519	1177	442	270	18647	10560	8559	84797	71797	11476
		12.6	8.24	79.6	18193	12599	2317	1091	608	439	1060	368	262	20860	10406	8601	87484	67398	10234
	Experiment 2	9.03	13.6	78.1	12163	7999	1800	1250	603	374	1065	394	318	22156	10689	10023	119250	83092	13863
		8.2	17.3	75.7	15665	7776	1934	1512	715	402	1336	487	318	21366	10668	9425	128387	82583	15428
		10	15	75.7	13824	8119	1823	1432	692	388	1255	434	316	21166	10867	9790	123045	84587	14820
		11.3	13.2	76	12724	8111	1934	1310	630	400	1307	449	323	21707	10699	9597	111116	82190	14515
		10.2	16.3	74	14036	8717	1895	1415	701	394	1105	458	315	19783	9897	9030	125636	89728	16080
				mean MFI (form experiment 1 PBS group)	16667.8	11980	2021.5	1188.25	626.75	435.25	1043.5	333.25	218.5	18871.5	9382.5	7658	93445.8	73066.2	11372.8
				mean MFI (form experiment 2 PBS group)	11037.6	6920.8	1721.8	1227.4	590.8	389.6	1281.6	418.2	320.4	21699.8	10628.2	9615.4	123182	82270.2	14556.6
			The expression of the indicated APC function molecules was analyzed as relative MFI, based on normalization against the mean MFI of the PBS group in each independent experiment.
					Relative CD86 MFI			Relative CD40 MFI			Relative PD-L1 MFI			Relative MHC-I MFI			Relative MHC-II MFI
					CCR7+LMAP3+MHC-Iihi cDC1	CCR7-LMAP3-MHC-Iilo cDC1	MHC-Iilo cDC1	CCR7+LMAP3+MHC-Iihi cDC1	CCR7-LMAP3-MHC-Iilo cDC1	MHC-Iilo cDC1	CCR7+LMAP3+MHC-Iihi cDC1	CCR7-LMAP3-MHC-Iilo cDC1	MHC-Iilo cDC1	CCR7+LMAP3+MHC-Iihi cDC1	CCR7-LMAP3-MHC-Iilo cDC1	MHC-Iilo cDC1	CCR7+LMAP3+MHC-Iihi cDC1	CCR7-LMAP3-MHC-Iilo cDC1	MHC-Iilo cDC1
			PBS	Experiment 1	99.7555	105.442	100.124	97.2859	94.4555	93.969	110.302	98.7247	99.3135	92.9232	99.174	102.768	92.9941	98.7296	94.489
					97.0797	99.5993	104.675	101.325	104.826	104.997	95.2563	108.327	101.602	115.211	110.365	111.726	99.6011	98.2109	102.376
					101.891	99.1736	96.1662	106.88	108.177	97.8748	108.194	97.5244	98.3982	98.4235	94.2926	91.8647	106.186	98.7104	101.409
					101.273	95.7846	99.0354	94.5087	92.5409	103.159	86.2482	95.4239	100.686	93.4425	96.1684	93.6406	101.219	104.349	101.726
				Experiment 2	105.802	93.862	98.0369	97.7676	94.6175	96.2526	91.4482	95.1698	98.3146	101.9	96.8838	98.103	103.189	97.508	94.5757
					99.2969	106.635	100.534	97.3603	100.203	100.873	95.0375	103.539	100.499	104.996	101.993	98.6646	91.2935	96.8467	94.6718
					95.1656	104.887	103.09	104.123	103.927	99.5893	113.608	106.408	103.308	104.983	104.928	108.69	103.64	107.589	107.649
					107.107	98.9192	101.173	101.434	102.234	101.643	106.586	100.67	98.9388	103.006	111.364	108.461	97.3001	99.7068	101.411
					92.6288	95.697	97.1658	99.3156	99.0183	101.643	93.3208	94.2133	98.9388	85.116	84.8309	86.0807	104.577	98.3491	101.693
			WT NK	Experiment 1	135.057	155.726	161.019	122.197	131.631	126.364	151.605	171.043	153.776	116.769	130.647	129.146	101.25	107.519	130.663
					138.183	130.359	140.391	102.756	108.018	102.47	121.897	139.835	130.435	91.1957	106.539	108.775	104.832	107.366	133.327
					144.069	137.679	141.529	108.226	113.123	118.782	135.41	146.437	131.808	104.141	118.828	118.02	101.718	105.266	132.228
					115.738	111.477	141.331	92.4048	106.262	105.916	93.8189	141.335	126.773	95.0905	111.878	119.692	98.1147	100.999	133.459
					134.253	135.192	150.928	99.3057	108.975	111.66	114.518	137.734	127.689	119.969	128.921	141.499	90.9266	96.5986	115.1
				Experiment 2	153.412	149.766	121.849	105.915	118.653	107.033	115.012	118.604	106.429	92.2727	108.259	110.281	93.6827	107.18	112.561
					155.278	152.685	124.172	105.1	121.361	105.493	98.2366	119.799	110.175	95.5585	114.798	117.905	93.2889	104.614	113.179
					154.889	146.038	126.496	113.248	126.947	112.166	107.912	126.973	116.105	90.1944	106.02	108.94	96.2301	108.038	129.742
					148.302	143.582	124.056	111.292	119.16	107.546	98.0805	115.495	103.933	97.6184	107.826	114.556	100.994	108.452	121.278
					138.889	132.384	119.003	103.226	117.637	110.37	97.7684	112.386	106.429	92.07	106.707	109.2	99.121	107.722	127.269
			Il10-/- NK	Experiment 1	144.519	134.115	164.037	104.692	116.474	107.524	102.606	115.256	109.238	112.757	132.097	135.78	96.9397	102.281	141.646
					127.738	135.167	149.988	102.924	110.251	106.146	103.464	111.43	105.493	111.39	130.168	131.914	88.2298	96.8258	127.296
					144.357	150.217	169.429	112.35	127.643	117.174	99.8752	118.364	102.996	104.517	126.875	126.56	92.062	100.369	137.715
					133.905	135.092	142.172	106.712	130.036	110.281	96.9101	119.082	107.054	102.732	123.4	123.492	97.2757	102.812	121.905
					143.169	143.573	159.04	116.221	119.665	118.093	101.904	128.407	107.99	127.669	145.537	150.992	99.5776	100.72	132.202
				Experiment 2	145.022	140.143	121.268	109.989	122.376	112.423	119.885	144.036	131.35	98.4203	113.011	118.768	100.357	108.189	121.594
					150.44	137.311	125.276	120.499	131.178	115.246	116.435	131.733	127.689	94.7106	109.849	112.611	100.817	106.172	126.142
					135.664	126.488	118.132	117.729	131.686	109.6	133.014	157.839	141.419	87.9593	105.785	108.753	102.613	111.647	124.658
					154.572	165.299	133.349	117.403	136.425	111.14	114.614	145.536	137.3	99.7982	115.203	116.012	97.5647	112.273	113.811
					172.42	160.314	133.581	124.246	140.826	113.45	128.222	146.437	140.046	98.4203	118.374	119.361	109.795	117.47	123.69
			Ifng-/- NK	Experiment 1	104.597	104.182	123.671	94.5087	88.0734	104.997	83.0993	94.2133	99.2509	108.19	112.774	120.684	95.7614	92.0247	102.315
					97.8176	108.656	111.699	101.494	116.953	102.01	104.245	116.451	99.2509	99.6847	111.271	106.19	97.5047	101.511	95.975
					112.139	106.052	108.236	91.2266	99.4017	107.524	97.9245	103.778	98.6267	101.025	112.923	113.554	96.5266	102.615	97.5841
					96.1078	111.052	118.13	98.38	109.294	119.242	101.982	107.365	100.811	98.8104	112.55	111.765	90.7446	98.2629	100.908
					109.151	105.167	114.618	91.8157	97.0084	100.862	86.2203	109.517	98.3146	110.537	110.909	112.314	93.6201	92.2423	89.987
				Experiment 2	110.196	115.579	104.542	101.841	102.065	95.9959	100.91	115.829	127.689	102.102	100.572	104.239	96.8081	100.999	95.2352
					141.924	112.357	112.324	123.187	121.022	103.183	111.835	125.731	114.416	98.4617	100.374	98.0198	104.226	100.38	105.986
					125.245	117.313	105.878	116.669	117.129	99.5893	98.2271	122.431	121.739	97.5401	102.247	101.816	99.8889	102.816	101.809
					115.279	117.197	112.324	106.73	106.635	102.669	112.793	132.633	123.57	100.033	100.666	99.8086	90.2049	99.9025	99.7142
					127.165	125.954	110.059	115.284	118.653	101.129	101.581	110.428	119.908	91.1667	93.1202	93.9118	101.992	109.065	110.465

## Sheet: cDC2
Figure 4. Syngeneic NK cell transfer modulates APC function of cDC in the metastatic lungs.
Figure 4B. NK-cell transfer affects the activation of lung cDCs: cDC2.
		% of cDC2			CD86 MFI			CD40 MFI			PD-L1 MFI			MHC-I MFI			MHC-II MFI
		CCR7+LMAP3+MHC-Iihi cDC2	CCR7-LMAP3-MHC-Iilo cDC2	MHC-Iilo cDC2	CCR7+LMAP3+MHC-Iihi cDC2	CCR7-LMAP3-MHC-Iilo cDC2	MHC-Iilo cDC2	CCR7+LMAP3+MHC-Iihi cDC2	CCR7-LMAP3-MHC-Iilo cDC2	MHC-Iilo cDC2	CCR7+LMAP3+MHC-Iihi cDC2	CCR7-LMAP3-MHC-Iilo cDC2	MHC-Iilo cDC2	CCR7+LMAP3+MHC-Iihi cDC2	CCR7-LMAP3-MHC-Iilo cDC2	MHC-Iilo cDC2	CCR7+LMAP3+MHC-Iihi cDC2	CCR7-LMAP3-MHC-Iilo cDC2	MHC-Iilo cDC2
PBS	Experiment 1	8.06	7.75	84.8	8038	4251	1310	1042	689	420	974	428	262	13589	9421	6106	70248	78839	17944
		7.4	9.51	83.8	9477	3911	1353	1141	765	480	1137	498	285	16915	11136	7025	72862	80579	18787
		10.8	10.3	79.7	10243	5417	1349	1366	832	466	1566	710	268	17182	9719	6099	79152	83129	19287
		9.18	7.78	83.4	6627	3902	1307	1084	691	422	1069	459	251	14027	8852	5677	67984	85441	19237
	Experiment 2	5.53	7.17	88	7088	3275	1238	1127	685	406	1134	457	347	17673	10573	7525	100872	100884	28111
		7.37	8.06	85.1	6198	3967	1329	1221	759	421	1389	602	375	20385	11197	7784	96652	104145	26292
		7.75	13.4	79.9	5808	3119	1406	1237	690	441	1302	632	397	19986	12453	8852	104985	100654	28858
		6.87	8.47	85.4	6207	3396	1292	1270	755	438	1620	759	396	21029	12430	9232	110479	101599	26833
		5.66	8.44	86.5	6933	3269	1216	1279	715	406	1369	577	334	17549	9483	6609	125597	103096	27480
WT NK	Experiment 1	25.7	18.3	56.7	13170	9639	2337	1697	1215	730	3419	1567	625	31973	19782	12037	88106	88702	18021
		12.7	13.3	74.8	10395	6568	1611	1088	870	501	1550	952	383	16419	13575	8726	76575	86731	19469
		11.5	12	77.2	12006	6928	1640	1176	869	520	1571	944	394	17616	15633	9631	82871	82563	18065
		8.09	9.94	82.7	11156	5354	1475	1180	782	448	1343	746	380	16233	13887	9365	87982	84046	18556
		12.5	6.1	81.8	12694	6733	1484	1111	913	475	1418	742	376	21443	16154	11346	76211	79612	16564
	Experiment 2	9.96	13.2	77.6	9326	4865	1501	1235	873	455	1629	806	448	20144	14167	10297	113832	107498	24810
		13.3	11.1	76.1	9136	5578	1514	1255	956	468	1528	888	453	21636	16306	11285	109469	108539	24385
		14.6	13.9	72.3	9601	4995	1518	1377	951	495	1783	858	468	19976	13974	9932	111839	106494	24976
		10.1	12.9	77.7	9709	5357	1491	1342	883	473	1490	717	456	21400	15340	11404	123612	111149	26337
		11.9	14.3	74.7	8806	4763	1465	1242	855	460	1505	750	439	19922	14780	10455	119935	108816	26133
Il10-/- NK	Experiment 1	10.8	12.7	76.7	12424	7485	1696	1215	816	496	1545	870	418	21089	17754	11893	75903	85344	18687
		14.8	10.6	75.9	12190	6017	1643	1233	840	537	1706	833	420	24154	16660	11356	88529	80610	18356
		15.7	16.7	68.5	13831	9187	1967	1507	1093	617	2426	1245	519	23662	17110	11562	80508	83431	18505
		10.1	13.6	76.9	11262	5978	1554	1187	843	501	1404	799	396	19302	14860	9923	79588	82805	19063
		15.6	12.7	72.1	12452	8836	1774	1399	950	556	1930	967	457	25785	18316	12402	81378	83424	18078
	Experiment 2	10.7	12.7	77.6	8666	4380	1443	1338	847	449	1609	795	459	20339	14324	11252	112202	107694	24403
		11.4	15.8	73.7	9922	5224	1553	1498	1008	496	1575	861	452	18958	15342	10510	121510	111426	25716
		10	15.6	75.3	9100	4212	1441	1539	1044	504	1637	816	474	19616	14088	10496	127082	113657	25366
		11.9	14.1	74.7	9267	5421	1589	1510	1083	506	1736	935	459	23939	16536	11142	114506	115432	23791
		12.5	15.2	73.2	10267	5215	1563	1494	1022	494	1724	790	464	21911	15130	11035	126988	112050	25490
Ifng-/- NK	Experiment 1	10.4	9.61	80.6	10181	5261	1462	1190	713	472	1353	656	332	18805	12278	8310	79119	82587	18778
		12.6	12	75.7	8739	6359	1521	1318	984	526	1693	862	332	19132	13169	7286	81220	87211	17710
		9.28	6.78	84.2	8926	4354	1334	1080	629	444	1207	492	309	15424	10648	7126	81300	85649	17974
		13.7	12.4	74.6	9938	8061	1712	1452	1036	566	2177	1355	383	22650	14788	8024	78919	88345	17501
		8.47	6.01	86	8460	4741	1397	1027	674	407	978	461	297	16358	11344	7298	73604	78211	16774
	Experiment 2	11.2	8.03	81	6994	4194	1317	1230	759	415	1169	528	358	18908	10566	7617	104877	106660	25058
		8.07	14.3	78.6	8219	3863	1418	1625	952	463	1583	773	420	19263	11606	7825	135043	110551	25819
		9.79	11.1	80	6335	3575	1371	1285	888	455	1563	683	396	19158	11406	8375	104174	106967	26488
		10.7	12	77.9	8581	5396	1563	1495	1016	481	1739	1170	469	22045	12627	7907	108249	107396	27430
		8.3	11.8	80.9	8263	3506	1381	1384	854	444	1360	539	378	17165	10308	7175	120511	105976	27151
				mean MFI (form experiment 1 PBS group)	8596.25	4370.25	1329.75	1158.25	744.25	447	1186.5	523.75	266.5	15428.2	9782	6226.75	72561.5	81997	18813.8
				mean MFI (form experiment 2 PBS group)	6446.8	3405.2	1296.2	1226.8	720.8	422.4	1362.8	605.4	369.8	19324.4	11227.2	8000.4	107717	102076	27514.8
			The expression of the indicated APC function molecules was analyzed as relative MFI, based on normalization against the mean MFI of the PBS group in each independent experiment.
					Relative CD86 MFI			Relative CD40 MFI			Relative PD-L1 MFI			Relative MHC-I MFI			Relative MHC-II MFI
					CCR7+LMAP3+MHC-Iihi cDC2	CCR7-LMAP3-MHC-Iilo cDC2	MHC-Iilo cDC2	CCR7+LMAP3+MHC-Iihi cDC2	CCR7-LMAP3-MHC-Iilo cDC2	MHC-Iilo cDC2	CCR7+LMAP3+MHC-Iihi cDC2	CCR7-LMAP3-MHC-Iilo cDC2	MHC-Iilo cDC2	CCR7+LMAP3+MHC-Iihi cDC2	CCR7-LMAP3-MHC-Iilo cDC2	MHC-Iilo cDC2	CCR7+LMAP3+MHC-Iihi cDC2	CCR7-LMAP3-MHC-Iilo cDC2	MHC-Iilo cDC2
			PBS	Experiment 1	93.5059	97.2713	98.5148	89.9633	92.5764	93.9597	82.0902	81.7184	98.3114	88.0787	96.3095	98.0608	96.8117	96.1486	95.3771
					110.246	89.4914	101.748	98.5107	102.788	107.383	95.8281	95.0835	106.942	109.637	113.842	112.82	100.414	98.2707	99.8578
					119.157	123.952	101.448	117.937	111.79	104.251	131.985	135.561	100.563	111.367	99.356	97.9484	109.083	101.381	102.515
					77.0918	89.2855	98.2892	93.5895	92.8451	94.4072	90.0969	87.6372	94.1839	90.9176	90.4927	91.1712	93.6916	104.2	102.25
				Experiment 2	109.946	96.1764	95.51	91.865	95.0333	96.1174	83.211	75.4873	93.8345	91.4543	94.1731	94.0578	93.6454	98.8326	102.167
					96.1407	116.498	102.53	99.5272	105.3	99.6686	101.923	99.4384	101.406	105.488	99.731	97.2951	89.7277	102.027	95.5558
					90.0912	91.5952	108.471	100.831	95.727	104.403	95.5386	104.394	107.355	103.424	110.918	110.644	97.4637	98.6073	104.882
					96.2803	99.7298	99.676	103.521	104.745	103.693	118.873	125.372	107.085	108.821	110.713	115.394	102.564	99.5331	97.5221
					107.542	96.0002	93.8127	104.255	99.1953	96.1174	100.455	95.3089	90.3191	90.8127	84.4645	82.6084	116.599	101	99.8735
			WT NK	Experiment 1	153.206	220.559	175.747	146.514	163.252	163.311	288.158	299.189	234.522	207.237	202.229	193.311	121.423	108.177	95.7863
					120.925	150.289	121.151	93.9348	116.896	112.081	130.636	181.766	143.715	106.422	138.775	140.137	105.531	105.773	103.483
					139.666	158.526	123.331	101.532	116.762	116.331	132.406	180.239	147.842	114.18	159.814	154.671	114.208	100.69	96.0202
					129.778	122.51	110.923	101.878	105.072	100.224	113.19	142.434	142.589	105.216	141.965	150.399	121.252	102.499	98.63
					147.669	154.064	111.6	95.9206	122.674	106.264	119.511	141.671	141.088	138.985	165.14	182.214	105.03	97.0914	88.042
				Experiment 2	144.661	142.87	115.8	100.668	121.115	107.718	119.533	133.135	121.147	104.241	126.185	128.706	105.677	105.312	90.1697
					141.714	163.808	116.803	102.299	132.63	110.795	112.122	146.68	122.499	111.962	145.237	141.055	101.626	106.332	88.625
					148.927	146.687	117.112	112.243	131.937	117.188	130.834	141.724	126.555	103.372	124.466	124.144	103.827	104.329	90.773
					150.602	157.318	115.029	109.39	122.503	111.979	109.334	118.434	123.31	110.741	136.632	142.543	114.756	108.889	95.7194
					136.595	139.874	113.023	101.239	118.618	108.902	110.434	123.885	118.713	103.092	131.645	130.681	111.343	106.603	94.978
			Il10-/- NK	Experiment 1	144.528	171.272	127.543	104.9	109.641	110.962	118.066	131.318	124.121	136.691	181.497	190.999	104.605	104.082	99.3263
					141.806	137.681	123.557	106.454	112.865	120.134	115.571	142.22	122.228	156.557	170.313	182.374	122.005	98.3085	97.5669
					160.896	210.217	147.923	130.11	146.859	138.031	120.12	134.787	128.177	153.368	174.913	185.683	110.951	101.749	98.3589
					131.011	136.789	116.864	102.482	113.268	112.081	127.385	154.443	124.121	125.108	151.912	159.361	109.684	100.985	101.325
					144.854	202.185	133.409	120.786	127.645	124.385	126.504	130.492	125.473	167.128	187.242	199.173	112.15	101.74	96.0893
				Experiment 2	134.423	128.627	111.325	109.064	117.508	106.297	130.215	166.11	156.848	105.25	127.583	140.643	104.164	105.504	88.6905
					153.906	153.412	119.812	122.106	139.845	117.424	143.784	159.045	157.598	98.104	136.65	131.368	112.805	109.16	93.4624
					141.155	123.693	111.171	125.448	144.839	119.318	204.467	237.709	194.747	101.509	125.481	131.193	117.978	111.346	92.1904
					143.746	159.198	122.589	123.084	150.25	119.792	118.331	152.554	148.593	123.88	147.285	139.268	106.303	113.085	86.4662
					159.257	153.148	120.583	121.78	141.787	116.951	162.663	184.63	171.482	113.385	134.762	137.931	117.89	109.772	92.6411
			Ifng-/- NK	Experiment 1	118.435	120.382	109.945	102.741	95.8011	105.593	85.7793	87.2151	96.8091	121.887	125.516	133.456	109.037	100.72	99.81
					101.661	145.507	114.382	113.792	132.214	117.673	116.158	127.684	113.575	124.006	134.625	117.011	111.933	106.359	94.1333
					103.836	99.6282	100.32	93.2441	84.5146	99.3289	114.69	112.818	107.085	99.9725	108.853	114.442	112.043	104.454	95.5365
					115.609	184.452	128.746	125.362	139.201	126.622	127.605	193.261	126.825	146.809	151.176	128.863	108.762	107.742	93.0224
					98.415	108.483	105.057	88.6682	90.561	91.0515	99.7945	89.032	102.217	106.026	115.968	117.204	101.437	95.3828	89.1582
				Experiment 2	108.488	123.165	101.605	100.261	105.3	98.2481	114.033	125.251	124.578	97.8452	94.1107	95.2077	97.3635	104.491	91.071
					127.49	113.444	109.397	132.458	132.075	109.612	142.689	164.582	124.578	99.6823	103.374	97.8076	125.368	108.303	93.8368
					98.2658	104.986	105.771	104.744	123.196	107.718	101.728	93.9379	115.947	99.1389	101.593	104.682	96.7108	104.792	96.2682
					133.105	158.464	120.583	121.862	140.954	113.873	183.481	258.711	143.715	114.079	112.468	98.8326	100.494	105.212	99.6918
					128.172	102.96	106.542	112.814	118.479	105.114	82.4273	88.0191	111.445	88.8255	91.8127	89.683	111.877	103.821	98.6778
														96.3095	98.0608	88.0787
														113.842	112.82	109.637
														99.356	97.9484	111.367
														90.4927	91.1712	90.9176
														94.1731	94.0578	91.4543
														99.731	97.2951	105.488
														110.918	110.644	103.424
														110.713	115.394	108.821
														84.4645	82.6084	90.8127
														202.229	193.311	207.237
														138.775	140.137	106.422
														159.814	154.671	114.18
														141.965	150.399	105.216
														165.14	182.214	138.985
														126.185	128.706	104.241
														145.237	141.055	111.962
														124.466	124.144	103.372
														136.632	142.543	110.741
														131.645	130.681	103.092
														181.497	190.999	136.691
														170.313	182.374	156.557
														174.913	185.683	153.368
														151.912	159.361	125.108
														187.242	199.173	167.128
														127.583	140.643	105.25
														136.65	131.368	98.104
														125.481	131.193	101.509
														147.285	139.268	123.88
														134.762	137.931	113.385
														125.516	133.456	121.887
														134.625	117.011	124.006
														108.853	114.442	99.9725
														151.176	128.863	146.809
														115.968	117.204	106.026
														94.1107	95.2077	97.8452
														103.374	97.8076	99.6823
														101.593	104.682	99.1389
														112.468	98.8326	114.079
														91.8127	89.683	88.8255
