# Supplementary material for: Syngeneic natural killer cell therapy activates dendritic and T cells in metastatic lungs and effectively treats low-burden metastases
Source: eLife. 2025 Jan 21;13:RP99010. doi: 10.7554/eLife.99010 (PMC11750138; doi:10.7554/eLife.99010)
Supplement: Figure 5—source data 1. [file elife-99010-fig5-data1.xlsx]

## Sheet: T cell panel
Figure 5. Syngeneic NK cell transfer promotes T cell activation in metastatic lungs.
		% of CD45.2+ cells
		Foxp3+CD4+ T cells	Foxp3-CD4+ T cells	CD8+ T cells	CD62L+CD44-Foxp3-CD4+ T cells	CD62L+CD44+Foxp3-CD4+ T cells	CD62L-CD44+Foxp3-CD4+ T cells	PD1+Foxp3-CD4+ T cells	Ki67+Foxp3-CD4+ T cells	CD62L+CD44-PD1-Lag3-CD8+ T cells	CD62L+CD44+PD1-Lag3-CD8+ T cells	CD62L-CD44+PD1-Lag3-CD8+ T cells	Ki67+PD1-Lag3-CD8+ T cells	TSCL CD8+ T cells	Ki67+ TSCL CD8+ T cells	Exhausted CD8+ T cells	Tpex CD8+ T cells
PBS	Experiment 1	1.03122	4.04125	1.33779	0.585284	0.0537904	3.06577	0.975474	0.404125	0.236901	0.195095	0.362319	0.0582497	0.11204	0.0224359	0.062709	0.0224359
		2.08	4.96	2.24	0.896	0.05616	3.68	1.392	0.48	0.304	0.368	0.512	0.07024	0.272	0.04912	0.07376	0.028
		1.86501	4.61812	2.6643	0.825933	0.0654529	3.5524	1.06572	0.559503	0.44405	0.888099	0.435169	0.142096	0.284192	0.0976909	0.0523979	0.039254
		1.29092	4.45674	1.16797	0.307361	0.0387275	3.9957	1.53681	0.445674	0.0869832	0.145075	0.307361	0.0484094	0.184417	0.0290456	0.0338097	0.0387275
	Experiment 2	1.4014	5.70571	2.9029	1.5015	0.14014	3.9039	1.4014	0.880881	0.570571	0.22022	0.41041	0.14014	0.4004	0.0692693	0.074975	0.0231231
		2.6694	6.67351	5.33881	0.852156	0.143737	5.44148	1.84805	1.23203	0.420945	0.667351	1.43737	0.585216	0.318275	0.0591376	0.811088	0.13347
		3.32295	5.81516	2.80374	1.14226	0.207684	4.25753	1.76532	1.14226	0.519211	0.695742	0.799585	0.425753	0.259605	0.103842	0.046729	0.0311526
		4.09207	9.14322	3.32481	1.72634	0.351662	6.84143	3.00512	1.53453	0.613811	0.831202	0.767263	0.236573	0.370844	0.121483	0.0485934	0.0411125
		2.08623	6.05007	1.94715	1.66898	0.15299	4.03338	1.87761	0.69541	0.340751	0.354659	0.521558	0.139082	0.201669	0.0557024	0.0764951	0.0214186
WT NK	Experiment 1	6.95612	7.23623	7.09617	0.980392	0.182073	5.88235	2.80112	0.933707	0.387488	3.26797	1.16713	0.387488	0.653595	0.135387	0.513539	0.219421
		3.60531	7.02087	4.26945	0.673624	0.142315	6.07211	2.56167	1.13852	0.189753	1.2334	0.787476	0.237192	0.645161	0.170778	0.265655	0.0904175
		1.64965	8.45448	4.22724	0.927931	0.0987731	7.21724	2.68069	1.13414	0.195896	1.03103	1.13414	0.360862	0.783586	0.237138	0.0864007	0.0617589
		1.91972	4.363	2.21059	0.354857	0.0930774	3.78127	1.33799	0.8726	0.145433	0.45957	0.639907	0.273415	0.45957	0.26178	0.0412449	0.00826062
		1.45833	4.09722	2.29167	0.534722	0.118056	3.26389	1.25	0.548611	0.125	0.465278	0.298611	0.0972222	0.645833	0.111111	0.0763889	0.0275694
	Experiment 2	2.35081	10.9403	3.4358	0.994575	0.253165	9.49367	3.25497	2.53165	0.253165	0.750452	0.886076	0.22604	0.479204	0.126582	0.135624	0.0581374
		3.06291	9.10596	3.97351	1.15894	0.182119	7.61589	3.22848	1.65563	0.273179	0.910596	0.827815	0.264901	0.546358	0.157285	0.231788	0.0778146
		3.39962	13.7909	4.81078	1.86017	0.404105	11.2251	3.72033	2.75818	0.416934	1.34702	1.73188	0.564464	0.525978	0.230917	0.0833868	0.0525337
		1.71821	8.31615	2.95533	0.893471	0.171821	7.01031	2.47423	1.51203	0.38488	0.659794	0.756014	0.226804	0.494845	0.171821	0.0453608	0.0453608
		1.96721	7.45902	4.2623	1.06557	0.114754	5.98361	2.86885	1.55738	0.622951	0.721311	1.31148	0.483607	0.688525	0.213115	0.0619672	0.0103279
Il10-/- NK	Experiment 1	1.78868	4.72723	3.06631	0.383289	0.0672033	4.08841	1.40539	0.574933	0.306631	0.741025	0.536604	0.124058	0.498275	0.153315	0.113709	0.0206976
		4.71406	9.58269	6.64606	1.00464	0.146832	8.19165	3.09119	1.62287	0.525502	1.85471	0.927357	0.262751	0.72643	0.146832	0.927357	0.193199
		4.18296	7.23221	5.5903	0.586396	0.187647	6.33307	2.61923	1.17279	0.28147	1.91556	1.09461	0.355747	0.860047	0.191556	0.175919	0.140735
		1.3076	6.91158	3.23786	0.684932	0.11208	5.91532	2.36613	1.1208	0.317559	0.747198	0.747198	0.180573	0.442092	0.0871731	0.0996264	0.0355542
		3.99369	7.04151	8.19758	0.998424	0.147136	5.7278	1.99685	1.20862	0.37835	1.62901	0.945875	0.320547	1.36626	0.325801	1.31372	0.341566
	Experiment 2	1.88934	13.9676	3.50877	0.944669	0.202429	12.5506	5.26316	4.31849	0.269906	0.546559	1.07962	0.452092	0.877193	0.377868	0.0255061	0.0383266
		3.16623	9.49868	10.5541	1.23131	0.281442	7.82762	3.69393	2.55057	0.457344	0.853122	1.31926	0.580475	2.19877	0.835532	0.395778	0.123131
		2.35369	12.0865	6.36132	1.52672	0.368957	9.92366	3.49873	3.3715	0.438931	0.826972	1.14504	0.508906	1.27226	0.368957	0.216285	0.0890585
		2.42483	6.98351	4.2192	0.775946	0.208535	5.86809	2.42483	1.60039	0.363725	1.21242	1.01843	0.412221	0.872939	0.42192	0.0824442	0.0872939
		2.35777	7.32957	4.71553	1.02512	0.158893	5.84316	2.71656	1.48642	0.353665	1.17888	0.871348	0.251153	0.563813	0.205023	0.169144	0.0666325
Ifng-/- NK	Experiment 1	2.61153	5.33188	2.50272	0.85963	0.0914037	4.13493	1.19695	0.565832	0.239391	0.565832	0.446137	0.108814	0.293798	0.0326442	0.152339	0.0195865
		4.6953	6.69331	3.7962	0.639361	0.10989	5.89411	2.1978	0.699301	0.21978	1.1988	0.48951	0.10989	0.4995	0.11988	0.40959	0.0776224
		1.61315	3.6872	1.45952	0.253495	0.0603779	3.37994	0.998617	0.499309	0.122907	0.222768	0.407129	0.0844984	0.299585	0.0473959	0.0129052	0.0172069
		4.52099	5.11302	4.14424	0.349839	0.129171	4.57481	2.15285	0.753498	0.193757	1.39935	0.441335	0.145318	0.861141	0.193757	0.360603	0.188375
		0.937317	3.28061	0.702988	0.445226	0.0585237	2.75337	1.11306	0.322203	0.0820152	0.123023	0.26362	0.044464	0.117165	0.0234329	0.00937317	0.00468073
	Experiment 2	0.889571	4.39673	1.84049	0.674847	0.0874233	3.47648	1.12474	0.449898	0.296524	0.132924	0.470348	0.102249	0.153374	0.0308793	0.0822086	0.0205521
		2.46696	9.86784	2.99559	0.76652	0.176211	8.72247	2.55507	2.37885	0.229075	0.76652	0.792952	0.264317	0.352423	0.086696	0.132159	0.0714537
		2.70655	7.83476	3.34758	1.35328	0.242165	6.12536	2.2792	1.49573	0.584046	0.641026	0.676638	0.19943	0.498575	0.19943	0.0997151	0.0422365
		3.76838	7.16912	3.67647	0.735294	0.165441	5.97426	2.75735	0.873162	0.303309	1.28676	0.854779	0.174632	0.367647	0.0863051	0.183824	0.110294
		1.78749	5.75968	4.86594	0.60576	0.119166	4.86594	1.88679	0.873883	0.148957	0.476663	0.734856	0.0932473	0.844091	0.218471	0.168818	0.098709
