# Supplementary material for: Syngeneic natural killer cell therapy activates dendritic and T cells in metastatic lungs and effectively treats low-burden metastases
Source: eLife. 2025 Jan 21;13:RP99010. doi: 10.7554/eLife.99010 (PMC11750138; doi:10.7554/eLife.99010)
Supplement: Figure 6—source data 1. [file elife-99010-fig6-data1.xlsx]

## Sheet: Fig 6A
Figure 6. Syngeneic NK cell transfer affects migratory cDCs in mLN.
Figure 6A. The expression of CCR7 and LAMP3 by migratory cDC1s.
	CCR7+LAMP3+									CCR7-LAMP3-
	Experiment 1				Experiment 2					Experiment 1				Experiment 2
PBS	90.5	94.6	87.2	86.3	95.3	93.3	98.9	92.5	93.7	8.84	5.43	11.9	13.7	3.33	5.83	1.15	4.72	5.7
WT	98.4	94.6	92.7	96.1	97.4	92.9	92.9	97.6	95.3	1.27	4.73	5.73	3.93	3.17	2.35	6.19	1.45	2.98
Il10-/-	91	98	96.9	93.5	93.1	95.6	85.7	95.4		9.04	2.04	2.52	6.52	8.05	2.19	14.3	3.38
Ifng-/-	95.7	94.2	97.3	88.2	92.4	96.6	96.6			3.99	4.87	2.7	11.8	6.52	3.36	3.36
Figure 6A. The expression of CCR7 and LAMP3 by migratory cDC2s.
	CCR7+LAMP3+									CCR7-LAMP3-
	Experiment 1				Experiment 2					Experiment 1				Experiment 2
PBS	65.5	70.7	59.1	58.6	77.1	74.8	59.4	74.4	80.5	34.5	29.3	40.9	41.4	22.1	25.2	40.6	25.6	18.8
WT	86.2	66.3	69.1	73.2	79.6	74.5	83.9	76.5	87.7	13.2	33.7	28.7	24.4	20.4	25.5	16.1	23.5	12.3
Il10-/-	69.2	78.3	86.8	39	80.2	82.8	63.5	79.9		30.8	21.7	11.4	61	18.7	16.7	36.5	19.4
Ifng-/-	70	61.6	70.7	61.2	74	77	81.1			29.1	37.7	28.4	38.3	26	22.1	18.9
Figure 6A. The expression of CCR7 and LAMP3 by resident cDC1s.
	CCR7+LAMP3+									CCR7-LAMP3-
	Experiment 1				Experiment 2					Experiment 1				Experiment 2
PBS	3.51	0	1.25	5	5.77	11.6	2.7	3.03	3.51	96.5	100	98.8	95	94.2	88.4	97.3	97	96.5
WT	17	0	2	5.8	10.3	15.6	4.65	3.64	13.3	83	100	98	94.2	89.7	84.4	95.3	96.4	86.7
Il10-/-	0	13.9	7.44	0	7.14	5.88	0	6.45		100	86.1	91.7	100	92.9	94.1	100	93.5
Ifng-/-	17.8	3.49	1.45	0.99	6.25	3.85	16.2			82.2	96.5	98.6	99	93.8	96.2	83.8
Figure 6A. The expression of CCR7 and LAMP3 by resident cDC2s.
	CCR7+LAMP3+									CCR7-LAMP3-
	Experiment 1				Experiment 2					Experiment 1				Experiment 2
PBS	2.6	0	1.27	1.11	2.42	1.4	2.8	3.61	2.63	97.4	100	98.7	98.9	97.6	97.9	96.5	94	97.4
WT	3.2	0	1.94	2.55	3.9	5.06	1.25	0.66	3.42	96.3	100	98.1	96.2	95.5	94.9	97.5	99.3	94.9
Il10-/-	0	6.14	1.48	0	0	3.57	2.31	4.21		100	93	98.5	100	96.7	96.4	97.7	94.7
Ifng-/-	1.2	1.8	0.78	1.3	1.15	3.66	5.71			98.8	98.2	99.2	98.7	98.9	95.1	92.9

## Sheet: cDC1
Figure 6. Syngeneic NK cell transfer affects migratory cDCs in mLN.
Figure 6B. NK cell transfer affected migratory cDC subsets: cDC1.
		% of cDC	CD86 MFI	CD40 MFI	PD-L1 MFI	MHC-I MFI	MHC-II MFI
		Migratory cDC1
PBS	Experiment 1	40.3756	9365	1616	1135	22778	57307
		34.715	8895	1623	1394	31528	62393
		32.13	7463	1654	1531	26544	54806
		21.9697	8988	1410	1074	25668	51979
	Experiment 2	32.1285	13154	1949	2031	44076	138388
		39.886	16423	2104	2564	48980	137722
		35.3635	13793	2068	3276	54638	143596
		34.4398	13008	1986	2614	45293	162068
		34.0824	18915	2265	3085	46585	171457
WT NK	Experiment 1	52.9595	13083	2215	2219	37355	47034
		38.8626	15232	1568	1540	28904	58854
		43.3071	13762	1695	1479	29255	59119
		49.7835	15762	1756	1783	30350	67223
	Experiment 2	41.5512	20422	1884	2995	45990	148781
		34.6591	17216	2103	2395	48141	126876
		34.4444	16886	1604	2610	40694	120969
		34.8432	21728	1904	2744	42468	148106
		43.7318	22608	1752	2782	45342	115946
Il10-/- NK	Experiment 1	45.8333	13755	1261	1388	22773	47902
		28.3525	12348	1741	1971	35935	46478
		50	15221	2123	2075	29144	60402
		35.2697	10255	2059	1449	23435	70987
	Experiment 2	32.6271	20254	2396	3282	51363	160562
		40.404	22142	1985	3140	46418	145147
		14.7541	15711	1963	2939	44431	151672
		47.2727	22555	1898	2804	44550	148362
Ifng-/- NK	Experiment 1	36.7647	10771	1750	1475	31271	55235
		39.2157	8504	1772	1641	26099	51816
		32.1839	10145	1639	1286	28538	59797
		28.3582	7910	1706	1453	28257	51468
	Experiment 2	33.6683	12636	1542	2216	35819	109022
		35.0467	14073	2041	2541	50004	128102
		32.5397	17871	1838	2424	49887	126675
		mean MFI (form experiment 1 PBS group)	8677.75	1575.75	1283.5	26629.5	56621.2
		mean MFI (form experiment 2 PBS group)	15058.6	2074.4	2714	47914.4	150646
	The expression of the indicated APC function molecules was analyzed as relative MFI, based on normalization against the mean MFI of the PBS group in each independent experiment.
	PBS	Experiment 1	107.92	102.554	88.4301	85.5367	101.211
			102.504	102.999	108.609	118.395	110.194
			86.0016	104.966	119.283	99.6789	96.794
			103.575	89.4812	83.6774	96.3893	91.8012
		Experiment 2	87.3521	93.9549	74.8342	91.989	91.8629
			109.061	101.427	94.4731	102.224	91.4208
			91.5955	99.6915	120.707	114.033	95.32
			86.3825	95.7385	96.3154	94.529	107.582
			125.609	109.188	113.67	97.2255	113.814
	WT NK	Experiment 1	150.765	140.568	172.887	140.277	83.0678
			150.765	140.568	172.887	140.277	83.0678
			175.529	99.5082	119.984	108.541	103.943
			158.589	107.568	115.232	109.859	104.411
			181.637	111.439	138.917	113.971	118.724
		Experiment 2	135.617	90.8214	110.354	95.9837	98.7619
			114.327	101.379	88.2461	100.473	84.2212
			112.135	77.3236	96.168	84.9306	80.3001
			144.29	91.7856	101.105	88.6331	98.3138
			150.133	84.4582	102.506	94.6313	76.9658
	Il10-/- NK	Experiment 1	158.509	80.0254	108.142	85.5179	84.6007
			142.295	110.487	153.564	134.944	82.0858
			175.403	134.729	161.667	109.443	106.677
			118.176	130.668	112.894	88.0039	125.372
		Experiment 2	134.501	115.503	120.929	107.197	106.582
			147.039	95.6903	115.696	96.8769	96.3496
			104.332	94.6298	108.29	92.73	100.681
			149.782	91.4963	103.316	92.9783	98.4837
	Ifng-/- NK	Experiment 1	124.122	111.058	114.92	117.43	97.5517
			97.9978	112.454	127.854	98.0078	91.5133
			116.908	104.014	100.195	107.167	105.609
			91.1527	108.266	113.206	106.112	90.8987
		Experiment 2	83.9122	74.3347	81.6507	74.7562	72.3696
			93.4549	98.3899	93.6256	104.361	85.035
			118.676	88.6039	89.3147	104.117	84.0877

## Sheet: cDC2
Figure 6. Syngeneic NK cell transfer affects migratory cDCs in mLN.
Figure 6Figure 6B. NK cell transfer affected migratory cDC subsets: cDC2.
		% of cDC	CD86 MFI	CD40 MFI	PD-L1 MFI	MHC-I MFI	MHC-II MFI
		Migratory cDC2
PBS	Experiment 1	23.0047	5806	1249	1050	15346	51039
		27.9793	4206	1317	1069	18601	56245
		32.491	4822	1168	1500	16853	51390
		30.303	4372	866	1006	15318	46650
	Experiment 2	30.1205	10250	1828	1922	28776	121600
		22.792	9511	1521	1682	27760	116615
		27.5049	8944	1491	2436	30509	102991
		27.8008	9602	1617	2132	30617	123647
		28.839	11741	1656	2139	30878	141501
WT NK	Experiment 1	31.1526	9553	2009	2567	32397	46157
		22.7488	7644	1340	1301	19306	50868
		21.6535	8168	1279	1417	18574	50412
		21.2121	7880	1414	1448	21560	59777
	Experiment 2	33.241	15728	1511	2690	30625	146160
		20.4545	12947	1490	2113	28489	112336
		28.3333	13995	1365	2742	29946	110724
		28.5714	13696	1624	2304	28842	132728
		29.1545	15742	1553	2518	36543	111805
Il10-/- NK	Experiment 1	25	9731	1230	1449	18261	50077
		35.6322	9106	1243	2041	24054	45145
		31.25	11510	1749	2050	24088	61891
		31.5353	4852	1155	1038	13477	56780
	Experiment 2	34.322	14709	1742	2827	29710	133026
		37.8788	15938	1778	2683	33906	137240
		26.2295	11686	1430	2469	26186	127939
		28	16308	1625	2440	31675	125113
Ifng-/- NK	Experiment 1	30.5147	6014	1311	1241	19571	49406
		25.8824	4695	1175	1447	16527	46025
		25.2874	5832	1262	1250	17388	54083
		29.3532	4767	1165	1318	17558	47849
	Experiment 2	28.1407	11487	1401	2076	25448	116105
		33.1776	10103	1878	2330	31828	120478
		28.9683	10551	1574	2229	31984	110960
		mean MFI (form experiment 1 PBS group)	4801.5	1150	1156.25	16529.5	51331
		mean MFI (form experiment 2 PBS group)	10009.6	1622.6	2062.2	29708	121271
	The expression of the indicated APC function molecules was analyzed as relative MFI, based on normalization against the mean MFI of the PBS group in each independent experiment.
			Relative CD86 MFI	Relative CD40 MFI	Relative PD-L1 MFI	Relative MHC-I MFI	Relative MHC-II MFI
	PBS	Experiment 1	120.921	108.609	90.8108	92.8401	99.4311
			87.5976	114.522	92.4541	112.532	109.573
			100.427	101.565	129.73	101.957	100.115
			91.0549	75.3043	87.0054	92.6707	90.8808
		Experiment 2	102.402	112.659	93.2014	96.8628	100.271
			95.0188	93.7384	81.5634	93.4428	96.1608
			89.3542	91.8896	118.126	102.696	84.9265
			95.9279	99.6549	103.385	103.06	101.959
			117.297	102.058	103.724	103.938	116.682
	WT NK	Experiment 1	198.959	174.696	222.011	195.995	89.9203
			159.2	116.522	112.519	116.797	99.098
			170.114	111.217	122.551	112.369	98.2097
			164.115	122.957	125.232	130.433	116.454
		Experiment 2	157.129	93.1221	130.443	103.087	120.524
			129.346	91.8279	102.463	95.8967	92.6324
			139.816	84.1242	132.965	100.801	91.3031
			136.829	100.086	111.725	97.085	109.448
			157.269	95.7106	122.103	123.007	92.1945
	Il10-/- NK	Experiment 1	202.666	106.957	125.319	110.475	97.557
			189.649	108.087	176.519	145.522	87.9488
			239.717	152.087	177.297	145.727	120.572
			101.052	100.435	89.773	81.533	110.615
		Experiment 2	146.949	107.359	137.087	100.007	109.693
			159.227	109.577	130.104	114.131	113.168
			116.748	88.1302	119.727	88.1446	105.499
			162.924	100.148	118.32	106.621	103.168
	Ifng-/- NK	Experiment 1	125.253	114	107.33	118.4	96.2498
			97.7819	102.174	125.146	99.9849	89.6632
			121.462	109.739	108.108	105.194	105.361
			99.2815	101.304	113.989	106.222	93.2166
		Experiment 2	114.76	86.3429	100.669	85.6604	95.7403
			100.933	115.74	112.986	107.136	99.3463
			105.409	97.0048	108.088	107.661	91.4977
