# Supplementary material for: Syngeneic natural killer cell therapy activates dendritic and T cells in metastatic lungs and effectively treats low-burden metastases
Source: eLife. 2025 Jan 21;13:RP99010. doi: 10.7554/eLife.99010 (PMC11750138; doi:10.7554/eLife.99010)
Supplement: Figure 7—source data 1. [file elife-99010-fig7-data1.xlsx]

## Sheet: Fig 7B
Figure 7. Ex vivo-expanded human NK cells exhibit anti-tumor activities in vitro.
Figure 7B. Expanded human NK cells kill tumor cells in vitro.
	K562							THP-1							U937
E:T	Donor 1			Donor 2				Donor 1			Donor 2				Donor 1			Donor 2
T only	5.15	3.37	3.76	6.8	4.13	4.76		1.61	1.9	1.63	1.47	1.37	1.45		1.61	2.19	2.04	2.3	2.46	2.28
0.2 :1	32.9	28.2	32.6	27.4	27.5	31.2		11.4	10.1	11.2	6.39	7.18	6.66		32.5	36.5	35	18.7	16.5	15.6
0.5:1	54.4	58.3	52.7	57.7	58.7	57.6		18	17.5	16.1	11.9	12.1	11.8		46.3	46.3	47.4	42.5	40	39.1
1:1	85.4	83.9	81	80.3	79.2	80.6		31.5	30.7	30.5	22.1	22.3	19.4		82	80.3	81.1	64.2	66.9	61.7
2:1	91	91.6	91.1	89.6	86.7	89.2		43.4	44.7	42.3	31.4	34	32.5		89.4	89.7	90	78.5	79.2	77
5:1	96.1	95.6	95.9	92.7	92.4	92.9		61.4	62.3	59.8	53	51.4	48.2		94.3	94		89.8	89.5	89.7

## Sheet: Fig 7C
Figure 7. Ex vivo-expanded human NK cells exhibit anti-tumor activities in vitro.
Figure 7C. Expanded human NK cells up-regulate IFN-𝛾 production in response to tumor cells in vitro.
	Donor 1					Donor 2
	𝛥MFI					𝛥MFI
	NK only	NK + K562	NK + THP1	NK + U937		NK only	NK + K562	NK + THP1	NK + U937
	508	1439	1052	1547		402	745	630	803
	737	1450	1077	1414		430	718	634	610
	616	1533	1087	1262		528	750	658	787
Column B		NK + K562	NK + THP1	NK + U937			NK + K562	NK + THP1	NK + U937
vs.		vs.	vs.	vs.			vs.	vs.	vs.
Column A		NK only	NK only	NK only			NK only	NK only	NK only
Unpaired t test
P value		0.0003	0.0025	0.0017			0.002	0.0088	0.0183
P value summary		***	**	**			**	**	*
Significantly different (P < 0.05)?		Yes	Yes	Yes			Yes	Yes	Yes
One- or two-tailed P value?		Two-tailed	Two-tailed	Two-tailed			Two-tailed	Two-tailed	Two-tailed
t, df		t=11.78 df=4	t=6.746 df=4	t=7.455 df=4			t=7.204 df=4	t=4.781 df=4	t=3.852 df=4
How big is the difference?
Mean ± SEM of column A		620.3 ± 66.14, n=3	620.3 ± 66.14, n=3	620.3 ± 66.14, n=3			453.3 ± 38.2, n=3	453.3 ± 38.2, n=3	453.3 ± 38.2, n=3
Mean ± SEM of column B		1474 ± 29.67, n=3	1072 ± 10.41, n=3	1408 ± 82.33, n=3			737.7 ± 9.939, n=3	640.7 ± 8.743, n=3	733.3 ± 61.84, n=3
Difference between means		853.7 ± 72.49	451.7 ± 66.96	787.3 ± 105.6			284.3 ± 39.47	187.3 ± 39.19	280 ± 72.69
95% confidence interval		652.4 to 1055	265.8 to 637.6	494.1 to 1081			174.7 to 393.9	78.54 to 296.1	78.19 to 481.8
R squared (eta squared)		0.972	0.9192	0.9329			0.9284	0.851	0.7877
F test to compare variances
F, DFn, Dfd		4.969, 2, 2	40.38, 2, 2	1.55, 2, 2			14.77, 2, 2	19.09, 2, 2	2.621, 2, 2
P value		0.335	0.0483	0.7845			0.1268	0.0996	0.5524
P value summary		ns	*	ns			ns	ns	ns
Significantly different (P < 0.05)?		No	Yes	No			No	No	No
