# Supplementary material for: Syngeneic natural killer cell therapy activates dendritic and T cells in metastatic lungs and effectively treats low-burden metastases
Source: eLife. 2025 Jan 21;13:RP99010. doi: 10.7554/eLife.99010 (PMC11750138; doi:10.7554/eLife.99010)
Supplement: Figure 8—source data 1. [file elife-99010-fig8-data1.xlsx]

## Sheet: Fig 8A
Figure 8. Clinical outcomes of autologous NK cell therapy.
Fgure 8A. Composition of the infused cells for each patient over six batches of cell preparation.
	CD3-
	CD56+DR+ (% of live cells)							CD56+DR- (% of live cells)
Subject	1	2	3	4	5	6		1	2	3	4	5	6
NK batch 1	89.6	80.7	92.2	92.8	91.2	93.3		1.91	1.74	1.64	0.967	1.4	2.95
NK batch 2	88.3	84.3	92	91.8	94.3	95		2.29	1.64	2.12	0.888	0.531	1.07
NK batch 3	88.6	83.8	95.6	93.1	95.6	96.9		1.79	1.24	0.731	0.316	0.333	0.451
NK batch 4	87.7	82.5	93.3	91.9	95	94.1		3.02	2.24	0.901	0.012	0.363	1.96
NK batch 5	88.2	82.4	94	89.3	95	95.1		2.3	1.07	0.579	0.178	1.22	1.54
NK batch 6	90	84.9	91.4	87.2	94.8	94.1		2.25	2.15	0.591	0.108	0.947	2.41
	CD3+CD19-CD14-
	TCR𝛼𝛽+ (% of live cells)							TCR𝛾𝛿+ (% of live cells)
Subject	1	2	3	4	5	6		1	2	3	4	5	6
NK batch 1	0.0224	0.0764	0.00582	0.0168	0.23	0.306		3.39	12.4	6.08	2.27	5.19	0.474
NK batch 2	0.0147	0.0252	0.00426	0.0225	0.386	0.0896		3	8.82	5.24	1.18	2.91	1.74
NK batch 3	0.026	0.0628	0.00701	0.0241	0.203	0.0572		3.93	10.4	2.3	2	2.13	0.783
NK batch 4	0.0522	0.0547	0.00222	0.0252	0.0711	0.506		3.36	9.48	4.73	1.28	1.54	1.5
NK batch 5	0.0347	0.0734	0.00359	0.0178	0.126	0.0161		3.68	12.1	3.95	1.88	1.63	1.05
NK batch 6	0.0102	0.0718	0.00273	0.0628	0.308	0.0112		2.24	9.95	6.34	1.55	1.6	0.685
	CD19-
	CD14+ (% of live cells)
Subject	1	2	3	4	5	6
NK batch 1	0.164	4.43	0.128	1.98	2.05	1.15
NK batch 2	1.35	4.88	0.102	0.82	1.11	1.46
NK batch 3	1.48	3.72	1.38	0.82	0.646	0.907
NK batch 4	2.08	5.07	1.07	0.86	2.91	1.7
NK batch 5	1.16	4	1.53	1.29	1.72	2.73
NK batch 6	1.46	1.9	1.28	1.18	1.93	1.08

## Sheet: Fig 8B
Figure 8. Clinical outcomes of autologous NK cell therapy.
Fgure 8B. Expression of NKRs, CD16 and CXCR3 by the expanded HLA-DR+ NK cells over six batches of cell preparation.
	NKG2A (% of HLA-DR+ NK)								NKp44 (% of HLA-DR+ NK)
Subject	1	2	3	4	5	6		Subject	1	2	3	4	5	6
NK batch 1	94.8	98.1	99.4	96.5	90.9	92.9		NK batch 1	44.6	27.3	42.9	37	72.2	31.5
NK batch 2	90.8	98.4	99.3	92.9	93.3	87.5		NK batch 2	31.9	30.6	39.8	27.7	62.3	23.2
NK batch 3	94.4	96.4	97.5	95.5	94.1	97.4		NK batch 3	36.6	19.5	60.1	25.6	66.8	39.1
NK batch 4	85.6	98	98.8	93.4	97.6	94.2		NK batch 4	25	24.9	43.1	32.1	57.9	37.3
NK batch 5	86	97.4	98.9	95.3	99	92.1		NK batch 5	33.6	17.4	40.3	31.4	92.9	32.9
NK batch 6	80.3	95.6	99.1	92.4	99	97.2		NK batch 6	29.5	22.1	52.9	31.4	97.3	37.2
	NKG2C (% of HLA-DR+ NK)								NKp46 (% of HLA-DR+ NK)
Subject	1	2	3	4	5	6		Subject	1	2	3	4	5	6
NK batch 1	25.3	10.6	3.51	0.315	4.77	25.4		NK batch 1	92	98.7	97.5	91.2	96.6	98.8
NK batch 2	21.7	8.96	2.15	0.406	1.33	22.9		NK batch 2	92.3	98.7	96.9	89.2	97.8	98.8
NK batch 3	22.7	9.65	4.26	1.08	2.67	18		NK batch 3	96.6	98.5	98.6	86.2	95.4	99.5
NK batch 4	24.8	13.6	5.54	0.229	1.52	18.9		NK batch 4	92.9	98.8	98.3	87.2	98.4	97.5
NK batch 5	23.2	13.7	5.38	0.484	1.47	20.7		NK batch 5	93.8	99	98.2	85.2	99.3	98.9
NK batch 6	17.3	14.3	3.4	0.226	2.16	18		NK batch 6	92.2	91.2	98.1	90	99.4	98.4
	NKG2D (% of HLA-DR+ NK)								CD16 (% of HLA-DR+ NK)
Subject	1	2	3	4	5	6		Subject	1	2	3	4	5	6
NK batch 1	99.2	99.2	99.6	99.6	83.5	98.5		NK batch 1	81.3	63	76.7	83.5	48.6	79.8
NK batch 2	98.9	98.7	99.5	99.6	93.9	99.4		NK batch 2	80.7	52.1	71.7	86.7	45.4	79
NK batch 3	99.5	96.8	99.5	99.2	96.4	99.9		NK batch 3	80.7	55.9	63	88.1	45.6	79.5
NK batch 4	99.8	98.8	99.7	98.9	98.2	99		NK batch 4	85.3	53.9	70.8	84.6	45.5	76.8
NK batch 5	99.7	97.7	99.7	98.9	98.3	99.2		NK batch 5	82.6	57.4	79.2	87.8	45.8	76.2
NK batch 6	99.7	98.8	99.6	97.9	98.4	99.3		NK batch 6	83.9	63.4	80.4	84.3	42.1	70
	NKp30 (% of HLA-DR+ NK)								CXCR3 (% of HLA-DR+ NK)
Subject	1	2	3	4	5	6		Subject	1	2	3	4	5	6
NK batch 1	85.8	98.9	98.7	84.4	98.3	98.2		NK batch 1	84.5	80.9	80.5	92.8	91.3	88.8
NK batch 2	82.6	99.1	93.5	77	98.7	96		NK batch 2	70.4	82.9	77.6	87.9	88.2	88.8
NK batch 3	85.3	97.7	99.2	84.6	98.8	98		NK batch 3	72.1	72.8	99.2	81.1	95.7	70.4
NK batch 4	82	98.6	99.4	83.7	99.2	92.9		NK batch 4	77	87.3	96.9	70.8	91.5	87.8
NK batch 5	75.4	98.8	98.9	89.3	98.5	97.1		NK batch 5	84.4	79.3	96.7	80.6	92.6	86.5
NK batch 6	75.2	98.8	98	81.8	98.7	97.3		NK batch 6	75.4	94.1	87	52.9	98.5	80.1

## Sheet: Fig 8C
Figure 8. Clinical outcomes of autologous NK cell therapy.
Fgure 8C. Expression of perforin and IFN-𝛾 by the expanded HLA-DR+ NK cells over six batches of cell preparation.
	Perforin (% of HLA-DR+ NK)								IFN-𝛾 (𝛥MFI)
Subject	1	2	3	4	5	6		Subject	1	2	3	4	5	6
NK batch 1	84.82	92.74	85.87	95.01	91.71	82.03		NK batch 1	140	319	128	390	376	73
NK batch 2	95.77	97.58	96.67	81.46	96.23	97.94		NK batch 2	204	507	79.6	416	84	760
NK batch 3	91.94	94.3	78.82	88.9	95.38	97.05		NK batch 3	144	276	413	28	31.7	741
NK batch 4	78.72	91.37	85.36	98.08	98.8	92.83		NK batch 4	41.5	392	129	44	145.8	449
NK batch 5	91.53	90.85	81.86	84.01	98.79	93.03		NK batch 5	107.4	244	100	-0.6	37	334
NK batch 6	92.71	84.88	94.28	88.92	98.17	73.53		NK batch 6	59.7	233	181	70	236	626
